# Supplementary material for: Mapping Quantitative Trait Locus (QTLs) for Hundred Pod and Seed Weight under Seven Environments in a RIL Cultivated Peanut (<em>Arachis hypogaea</em> L.) Population
Source: Preprints.org preprint supplement (doi:10.20944/preprints202308.1384.v1), 2023-08-18
Supplement: Supplementary file 1 [file supplementary]

## Sheet: Sheet1
Table S1 Marker position information of the integrated high-density genetic map
Chromosome A01
SMK49	0
SATE0631	0
Ah3TC36D11	3.693
SMK48	4.117
SMK46	4.56
SMK47	4.7
SMK45	5.698
SMK44	5.769
SMK43	6.757
SMK42	8.091
SMK41	9.616
SMK40	9.966
SMK39	12.264
SMK38	12.603
seq3B5	12.722
SMK37	12.873
SMK36	13.079
SMK32	15.189
SMK35	15.215
SMK31	15.341
SMK33	15.425
SMK34	15.536
SMK30	15.756
SMK29	16.979
gi0919	17.625
SMK28	23.535
GM2350	28.085
seq4B09	31.457
SMK10	34.756
SMK12	34.771
SMK13	34.8
SMK14	35.003
SMK17	35.242
SMK27	35.579
SMK19	35.803
SMK18	35.842
SMK26	35.846
SMK24	35.853
SMK25	35.866
SMK21	36.121
SMK20	36.173
SMK23	36.391
SMK22	36.434
SMK11	36.967
SMK15	37.392
SMK16	37.804
ARS756	40.654
SMK9	41.716
SMK8	41.731
SMK7	41.784
SMK5	42.823
SMK6	42.832
GM672	44.876
GM1090	45.909
SMK2	48.405
SMK3	48.427
SMK4	49.002
Ad92L24	49.886
SMK1	50.386
SATE0379	51.424
seq16F10	53.564
GA110	66.41
GM1992	75.163
Ah3TC20D05	78.471
S1	78.89
Chromosome A02
SMK53	0
pPGSseq14F4	0
AHGS1487	1.032
SMK51	2.093
SMK50	4.516
me1em9-90	6.727
Ah3TC13E05	11.618
SMK54	15.788
SMK55	24.353
AHGS1463	24.726
SMK278	28.371
AHGS1163	28.586
SMK273	30.136
SMK277	30.275
SMK276	30.628
SMK275	31.178
SMK269	32.943
SMK272	33.17
SMK270	33.17
SMK57	33.503
SMK268	34.038
SMK271	34.04
SMK267	34.353
SMK266	34.765
AHGS1886	35.04
SMK264	35.157
SMK265	35.457
SMK258	35.711
SMK263	35.849
SMK261	35.849
SMK259	35.875
SMK262	35.898
SMK257	36.101
SMK260	36.314
SMK256	36.449
SMK65	36.825
SMK243	37.722
SMK247	37.723
SMK250	37.723
SMK244	37.725
SMK246	37.727
SMK241	37.729
SMK245	37.731
SMK242	37.799
SMK248	37.823
SMK240	37.869
SMK252	37.876
SMK237	37.969
SMK239	37.973
SMK249	38.032
SMK236	38.038
SMK251	38.085
SMK238	38.154
SMK253	38.26
SMK227	38.613
SMK228	38.622
SMK229	38.64
SMK233	38.843
SMK234	38.853
SMK235	38.866
SMK230	38.872
SMK231	38.92
SMK232	38.989
SMK215	39.376
SMK218	39.388
SMK219	39.391
SMK220	39.416
SMK225	39.418
SMK217	39.419
SMK216	39.437
SMK223	39.438
SMK214	39.44
SMK226	39.442
SMK224	39.442
SMK213	39.446
SMK222	39.45
SMK221	39.457
SMK195	39.585
SMK198	39.586
SMK197	39.59
SMK196	39.591
SMK199	39.612
SMK200	39.614
SMK123	39.665
SMK209	39.754
SMK205	39.756
SMK201	39.756
SMK202	39.759
SMK203	39.765
SMK204	39.772
SMK210	39.773
SMK206	39.776
SMK212	39.782
SMK208	39.783
SMK207	39.787
SMK211	39.787
SMK185	39.929
SMK180	39.929
SMK176	39.931
SMK191	39.931
SMK178	39.962
SMK174	39.976
SMK187	39.979
SMK190	39.979
SMK183	39.98
SMK192	39.981
SMK177	39.982
SMK182	39.991
SMK179	39.998
SMK188	39.998
SMK181	39.999
SMK120	40.006
SMK117	40.007
SMK126	40.013
SMK155	40.013
SMK159	40.013
SMK160	40.013
SMK184	40.013
SMK156	40.013
SMK152	40.013
SMK150	40.013
SMK151	40.013
SMK154	40.013
SMK186	40.014
SMK193	40.014
SMK147	40.015
SMK189	40.015
SMK175	40.015
SMK149	40.015
SMK72	40.016
SMK146	40.016
SMK138	40.027
SMK139	40.027
SMK194	40.028
SMK137	40.028
SMK144	40.029
SMK145	40.029
SMK142	40.029
SMK143	40.03
SMK140	40.031
SMK161	40.033
SMK136	40.034
SMK135	40.034
SMK153	40.036
SMK158	40.036
SMK148	40.036
SMK157	40.036
SMK141	40.046
SMK115	40.056
SMK162	40.063
SMK119	40.065
SMK116	40.066
SMK166	40.066
SMK168	40.068
SMK171	40.069
SMK127	40.069
SMK118	40.069
SMK128	40.073
SMK130	40.074
SMK169	40.078
SMK163	40.078
SMK164	40.078
SMK83	40.078
SMK129	40.083
SMK132	40.085
SMK134	40.087
SMK82	40.089
SMK92	40.091
SMK172	40.094
SMK170	40.096
SMK131	40.097
SMK133	40.099
SMK165	40.101
SMK167	40.101
SMK74	40.109
SMK173	40.116
SMK71	40.134
SMK77	40.135
SMK78	40.141
SMK73	40.146
SMK91	40.146
SMK76	40.146
SMK80	40.164
SMK81	40.167
SMK87	40.167
SMK79	40.17
SMK88	40.197
SMK84	40.206
SMK85	40.22
SMK86	40.221
SMK104	40.241
SMK103	40.241
SMK106	40.241
SMK110	40.243
SMK109	40.245
SMK114	40.245
SMK94	40.247
SMK93	40.247
SMK105	40.247
SMK108	40.248
SMK75	40.251
SMK113	40.267
SMK112	40.267
SMK89	40.275
SMK100	40.283
SMK97	40.283
SMK90	40.285
SMK96	40.286
SMK125	40.292
SMK111	40.322
SMK107	40.322
SMK101	40.346
SMK98	40.346
SMK102	40.348
SMK99	40.348
SMK95	40.349
SMK121	40.51
SMK124	40.759
SMK122	40.8
SMK254	41.234
SMK255	41.83
SMK70	42.554
SMK69	42.69
SMK68	42.697
SMK66	43.249
SMK67	43.251
SMK63	43.731
SMK64	43.883
SMK62	44.312
SMK61	44.871
SMK60	45.085
SMK59	45.09
SMK58	45.214
SMK274	45.952
SMK56	46.512
SMK284	53.104
SMK281	55.094
SMK279	55.331
SMK282	55.443
SMK283	55.882
SMK280	55.999
SMK285	57.078
SMK286	59.279
SMK287	59.531
SMK290	59.973
SMK288	60.337
SMK289	60.365
AHGS1159	61.722
SMK291	63.315
SMK292	67.849
SMK297	76.028
SMK296	77.256
SMK295	77.627
SMK293	77.851
SMK294	78.133
SMK298	79.191
Chromosome A03
SMK299	0
SMK300	0
SMK301	0
SMK302	0
SMK303	0
SMK304	0
ARS749	0
SMK305	0.309
SMK306	0.88
SMK307	1.494
SMK308	1.494
SMK309	1.494
SMK310	2.42
SMK311	2.725
SMK312	3.651
SMK313	4.108
SMK314	4.486
SMK315	4.864
SMK316	5.137
SMK317	5.137
SMK318	5.297
SMK319	5.403
SMK320	5.403
SMK321	5.403
SMK322	5.403
SMK323	5.671
SMK324	5.961
SMK325	6.259
SMK326	7.141
SMK327	7.141
SMK328	7.141
SMK329	7.464
SMK330	7.791
SMK331	7.791
SMK332	8.081
SMK333	8.081
RM17H09	8.289
SMK334	8.64
SMK335	8.64
SMK336	8.64
SMK337	8.64
SMK338	8.64
SMK339	8.926
SMK340	9.222
SMK341	9.832
SMK342	10.22
AHGS1183	10.342
SMK343	10.38
SMK344	10.922
SMK345	11.195
SMK346	11.195
SMK347	11.992
SMK348	11.992
SMK349	12.151
SMK350	12.417
SMK351	12.872
SMK352	13.335
SMK353	13.947
SMK354	14.562
SMK355	14.955
me8em1-286	15.023
SMK356	15.223
SMK357	15.489
SMK358	15.595
SMK359	15.702
SMK360	16.124
SMK361	16.451
SMK362	16.787
SMK363	17.097
SMK364	17.097
SMK365	17.257
SMK366	17.257
SMK367	17.257
SMK368	17.417
SMK369	17.523
TC2C07	17.882
SMK370	17.942
SMK371	18.287
SMK372	18.287
SMK373	18.287
SMK374	18.958
SMK375	18.958
SMK376	19.237
SMK377	19.237
SMK378	19.397
SMK379	19.689
SMK380	19.689
SMK381	20.678
SMK382	20.784
SMK383	21.452
SMK384	21.559
SMK385	22.004
SMK386	22.11
GM1883	22.362
SMK387	23.196
SMK388	23.302
SMK389	23.302
SMK390	23.302
SMK391	23.409
SMK392	23.409
SMK393	23.409
SMK394	23.409
SMK395	23.409
SMK396	23.515
SMK397	23.621
SMK398	23.728
SMK399	23.834
SMK400	23.834
SMK401	23.834
SMK402	24.547
SMK403	24.956
SMK404	25.062
SMK405	25.169
SMK406	25.275
SMK407	25.382
SMK408	25.488
SMK409	25.594
SMK410	25.701
SMK411	25.807
AhTE0570	25.891
SMK412	26.077
SMK413	26.453
SMK414	26.453
SMK415	26.826
SMK416	26.826
SMK417	26.826
SMK418	26.826
SMK419	26.826
SMK420	26.826
SMK421	26.933
SMK422	26.933
SMK423	26.933
SMK424	26.933
SMK425	27.039
SMK426	27.305
SMK427	27.305
SMK428	27.305
SMK429	27.412
SMK430	29.66
SMK431	31.025
SMK432	31.835
SMK433	32.101
SMK434	32.101
SMK435	32.581
SMK436	32.581
SMK437	32.794
SMK438	33.113
SMK439	33.379
SMK440	33.485
SMK441	33.698
SMK442	33.911
SMK443	34.124
SMK444	34.39
SMK445	34.656
GM2206	34.975
SMK446	35.136
SMK447	35.402
SMK448	36.385
SMK449	36.651
SMK450	36.864
SMK451	37.077
SMK452	37.449
SMK453	37.768
SMK454	38.088
SMK455	38.407
SMK456	38.726
SMK457	39.045
SMK458	39.364
SMK459	39.683
SMK460	40.002
SMK461	40.322
SMK462	40.641
SMK463	41.013
SMK464	41.385
SMK465	41.758
SMK466	42.13
SMK467	42.343
SMK468	42.823
SMK469	43.195
SMK470	43.515
SMK471	44.154
SMK472	44.527
SMK473	44.846
SMK474	45.486
SMK475	46.125
SMK476	46.444
SMK477	46.764
SMK478	47.136
SMK479	47.616
SMK480	48.098
SMK481	48.739
Ah1TC04G02	48.773
SMK482	49.382
SMK483	49.918
SMK484	50.024
SMK485	50.024
SMK486	50.402
SMK487	51.055
SMK488	51.605
IPAHM93	52.759
SMK489	53.002
SMK490	53.655
SMK491	55.15
seq13E6A	55.57
SMK492	55.797
SMK493	56.065
SMK494	57.152
SMK495	57.421
SMK496	58.07
SMK497	59.006
SMK498	59.555
SMK499	59.555
SMK500	60.366
SMK501	61.19
SMK502	62.36
SMK503	68.643
SMK504	70.874
pPGSSeq19D09	73.348
SMK505	76.501
SMK506	83.264
SMK507	84.865
SMK508	84.865
SMK509	85.735
SMK510	86.51
SMK511	86.857
SMK512	87.19
SMK513	87.528
SMK514	88.223
SMK515	89.997
SMK516	92.394
SMK517	92.975
SMK518	94.138
SMK519	94.138
SMK520	94.138
SMK521	94.138
SMK522	94.138
SMK523	94.919
SMK524	95.515
SMK525	97.334
SMK526	97.334
SMK527	97.925
SMK528	98.514
SMK529	99.069
SMK530	99.357
SMK531	99.941
SMK532	100.845
SMK533	101.427
SMK534	101.714
SMK535	102.295
SMK536	103.452
SMK537	104.007
SMK538	105.656
SMK539	106.743
SMK540	107.012
SMK541	108.727
SMK542	110.452
SMK543	111.011
SMK544	111.566
SMK545	112.141
Chromosome A04
SMK546	0
ARS772	0
SMK548	0.929
SMK547	1.159
SMK549	16.574
GM1867	19.574
SMK551	20.985
SMK550	20.988
SMK552	21.585
SMK553	21.85
SMK554	25.599
PM427	26.297
SMK556	28.979
SMK555	29.306
AHGS1967	30.593
SMK557	30.74
PM375	34.591
SMK558	35.177
ARS726	38.044
SMK605	42.349
SMK568	43.332
SMK565	43.575
SMK566	43.599
SMK567	43.829
SMK572	44.185
SMK564	44.405
SMK560	44.493
SMK573	44.584
SMK562	44.63
SMK571	44.655
SMK563	44.665
SMK561	44.775
SMK569	44.856
SMK570	44.874
SMK585	44.888
SMK559	44.958
SMK590	44.962
SMK579	44.976
SMK583	44.987
SMK581	44.992
SMK588	45
SMK578	45.005
SMK582	45.011
SMK580	45.013
SMK589	45.023
SMK587	45.06
SMK586	45.067
SMK574	45.101
SMK584	45.128
SMK577	45.23
SMK576	45.326
SMK575	45.34
SMK594	45.554
SMK592	45.83
SMK591	45.895
SMK595	46.032
SMK593	46.11
SMK596	46.318
GM1135	46.405
SMK597	46.51
SMK598	47.526
SMK601	48.068
SMK600	48.417
SMK599	48.746
SMK602	48.972
SMK603	49.163
SMK604	49.597
SMK606	51.192
SMK607	52.54
SMK608	52.728
RN35B05	53.751
SMK609	54.207
SMK610	54.903
ARS754	55.74
SMK611	55.94
SMK612	57.802
SMK613	58.766
SMK614	59.692
AHGS2481	61.593
SMK615	62.217
SMK616	62.783
SMK617	63.052
SMK618	65.154
SMK620	69.106
SMK619	69.106
pPGSseq15C12a	69.387
SMK621	69.46
SMK623	71.361
SMK622	71.699
SMK624	71.734
SMK625	71.985
SMK627	72.234
SMK626	72.244
SMK628	73.282
SMK631	75.804
SMK630	76.113
SMK629	76.419
me7em17-133	85.026
pPGSseq15C12b	101.056
Chromosome A05
SMK846	0
me14em5-116	0
SMK848	0.179
SMK849	0.184
me7em9-96	0.609
SMK847	0.769
GM1988	0.876
me12em13-108	1.435
SMK845	1.543
SMK844	1.996
SMK843	2.507
SMK842	2.654
SMK839	3.45
SMK837	3.547
SMK838	3.56
SMK840	3.797
SMK841	3.89
SMK836	4.416
SMK834	4.553
SMK835	4.553
SMK830	4.553
SMK832	4.593
SMK833	4.603
SMK828	5.224
SMK672	5.988
SMK660	6.266
SMK669	6.269
SMK661	6.277
SMK664	6.278
SMK670	6.282
SMK656	6.296
SMK673	6.309
SMK662	6.31
SMK663	6.311
SMK655	6.314
SMK667	6.32
SMK674	6.325
SMK666	6.326
SMK671	6.328
SMK668	6.329
SMK665	6.33
SMK659	6.331
SMK657	6.333
SMK658	6.335
SMK765	6.502
SMK700	6.504
SMK797	6.505
SMK678	6.505
SMK683	6.505
SMK785	6.505
SMK684	6.505
SMK802	6.505
SMK768	6.507
SMK780	6.507
SMK730	6.507
SMK706	6.508
SMK712	6.508
SMK736	6.508
SMK747	6.519
SMK681	6.522
SMK693	6.522
SMK690	6.524
SMK728	6.527
SMK692	6.529
SMK676	6.532
SMK677	6.532
SMK735	6.535
SMK688	6.535
SMK738	6.536
SMK697	6.537
SMK689	6.54
SMK756	6.541
SMK792	6.543
SMK791	6.544
SMK734	6.545
SMK733	6.545
SMK723	6.545
SMK682	6.545
SMK769	6.545
SMK775	6.545
SMK729	6.545
SMK787	6.546
SMK763	6.546
SMK815	6.546
SMK767	6.546
SMK679	6.546
SMK816	6.546
SMK805	6.546
SMK722	6.546
SMK713	6.546
SMK819	6.546
SMK762	6.546
SMK811	6.546
SMK720	6.546
SMK783	6.546
SMK718	6.546
SMK755	6.546
SMK807	6.546
SMK820	6.546
SMK790	6.546
SMK705	6.546
SMK741	6.546
SMK774	6.546
SMK707	6.546
SMK699	6.546
SMK703	6.546
SMK771	6.546
SMK758	6.546
SMK786	6.546
SMK779	6.546
SMK687	6.546
SMK814	6.546
SMK809	6.546
SMK810	6.546
SMK813	6.546
SMK710	6.547
SMK794	6.547
SMK704	6.547
SMK698	6.547
SMK793	6.547
SMK750	6.547
SMK817	6.547
SMK708	6.547
SMK821	6.547
SMK799	6.547
SMK812	6.547
SMK776	6.547
SMK695	6.547
SMK675	6.547
SMK726	6.547
SMK724	6.547
SMK777	6.547
SMK808	6.547
SMK725	6.547
SMK784	6.547
SMK719	6.547
SMK772	6.547
SMK732	6.547
SMK803	6.547
SMK711	6.547
SMK759	6.547
SMK709	6.547
SMK746	6.547
SMK781	6.547
SMK701	6.547
SMK806	6.547
SMK822	6.547
SMK744	6.547
SMK818	6.547
SMK764	6.547
SMK778	6.547
SMK721	6.547
SMK804	6.547
SMK773	6.547
SMK739	6.547
SMK752	6.547
SMK801	6.547
SMK680	6.547
SMK795	6.547
SMK696	6.547
SMK717	6.547
SMK715	6.547
SMK748	6.547
SMK694	6.548
SMK740	6.549
SMK789	6.554
SMK749	6.556
SMK796	6.557
SMK800	6.558
SMK766	6.559
SMK737	6.56
SMK745	6.562
SMK753	6.562
SMK743	6.566
SMK757	6.567
SMK751	6.572
SMK823	6.583
SMK761	6.583
SMK770	6.597
SMK754	6.597
SMK691	6.597
SMK731	6.599
SMK782	6.599
SMK727	6.599
SMK798	6.599
SMK702	6.599
SMK714	6.6
SMK788	6.6
SMK760	6.601
SMK685	6.602
SMK716	6.602
SMK686	6.602
SMK742	6.609
SMK827	6.745
SMK825	6.77
SMK826	6.79
SMK824	6.852
PM418	6.878
SATE0405	7.333
SMK831	7.798
SMK829	8.119
SMK654	9.358
SMK651	9.522
SMK652	9.603
SMK649	9.671
SMK653	9.78
SMK650	9.928
SMK648	10.174
SMK646	10.344
SMK647	10.386
SMK640	10.545
SMK642	10.545
SMK637	10.546
SMK639	10.546
SMK638	10.546
SMK643	10.546
SMK644	10.549
SMK641	10.569
SMK645	10.569
SMK636	13.743
SMK635	16.562
SMK634	16.781
SMK632	18.036
SMK633	18.537
me13em5-112	20.904
pPGSSeq11E11	23.63
GA35a	24.278
AhTE0588	27.815
GA35b	28.842
T5me8-66	38.954
GM1577a	39.785
Ah1TC06E01	44.947
seq9A7a	47.425
T2me4-75	49.115
seq9A7b	55.889
SATE0620	62.082
seq18C2	65.1
GM1878	78.302
Chromosome A06
SMK852	0
IPAHM659	0
GM1489	0.278
me4em15-95	0.335
GM1490-A06	2.209
SMK853	2.516
SMK854	4.165
SMK855	6.977
SMK856	10.719
SMK857	12.378
SMK858	14.601
SMK859	15.968
SMK860	17.055
SMK861	18.722
SMK862	19.542
me7em1-85	19.555
SMK863	21.191
SMK864	21.731
SMK865	22
SMK866	23.093
TC7C06	24.445
SMK867	24.46
SMK868	24.997
SMK869	26.371
SMK870	27.187
SMK871	27.454
SMK872	27.992
SMK873	28.529
SMK874	29.34
SMK875	30.151
SMK876	30.689
SMK877	30.689
SMK878	31.226
SMK879	32.314
SMK880	32.314
SMK881	32.581
SMK882	32.581
SMK883	32.581
SMK884	33.392
SMK885	33.659
SMK886	33.659
SMK887	33.928
SMK888	33.928
SMK889	33.928
SMK890	33.928
SMK891	33.928
SMK892	33.928
SMK893	33.928
SMK894	33.928
SMK895	33.928
SMK896	33.928
SMK897	33.928
SMK898	33.928
SMK899	33.928
SMK900	33.928
SMK901	33.928
SMK902	33.928
SMK903	33.928
SMK904	33.928
SMK905	33.928
SMK906	33.928
SMK907	33.928
SMK908	33.928
SMK909	33.928
SMK910	33.928
SMK911	33.928
SMK912	33.928
SMK913	33.928
SMK914	33.928
SMK915	33.928
SMK916	33.928
SMK917	33.928
SMK918	33.928
SMK919	33.928
SMK920	33.928
SMK921	33.928
SMK922	33.928
SMK923	33.928
SMK924	33.928
SMK925	33.928
SMK926	33.928
SMK927	33.928
SMK928	33.928
SMK929	33.928
SMK930	33.928
SMK931	33.928
SMK932	33.928
SMK933	33.928
SMK934	33.928
SMK935	33.928
SMK936	33.928
SMK937	33.928
SMK938	33.928
SMK939	33.928
SMK940	33.928
SMK941	33.928
SMK942	33.928
SMK943	33.928
SMK944	33.928
SMK945	33.928
SMK946	33.928
SMK947	33.928
SMK948	33.928
SMK949	33.928
SMK950	33.928
SMK951	33.928
SMK952	33.928
SMK953	33.928
SMK954	33.928
SMK955	33.928
SMK956	33.928
SMK957	33.928
SMK958	33.928
SMK959	33.928
SMK960	33.928
SMK961	33.928
SMK962	33.928
SMK963	33.928
SMK964	33.928
SMK965	33.928
SMK966	33.928
SMK967	33.928
SMK968	33.928
SMK969	33.928
SMK970	33.928
SMK971	33.928
SMK972	33.928
SMK973	33.928
SMK974	33.928
SMK975	33.928
SMK976	33.928
SMK977	33.928
SMK978	33.928
SMK979	33.928
SMK980	33.928
SMK981	33.928
SMK982	33.928
SMK983	33.928
SMK984	33.928
SMK985	33.928
SMK986	33.928
SMK987	33.928
SMK988	33.928
SMK989	33.928
SMK990	33.928
SMK991	33.928
SMK992	33.928
SMK993	33.928
SMK994	33.928
SMK995	33.928
SMK996	33.928
SMK997	33.928
SMK998	33.928
SMK999	33.928
SMK1000	33.928
SMK1001	33.928
SMK1002	33.928
SMK1003	33.928
SMK1004	33.928
SMK1005	33.928
SMK1006	33.928
SMK1007	33.928
SMK1008	33.928
SMK1009	33.928
SMK1010	33.928
SMK1011	33.928
SMK1012	33.928
SMK1013	33.928
SMK1014	33.928
SMK1015	33.928
SMK1016	33.928
SMK1017	33.928
SMK1018	33.928
SMK1019	33.928
SMK1020	33.928
SMK1021	33.928
SMK1022	33.928
SMK1023	33.928
SMK1024	33.928
SMK1025	33.928
SMK1026	33.928
SMK1027	33.928
SMK1028	33.928
SMK1029	33.928
SMK1030	33.928
SMK1031	33.928
SMK1032	33.928
SMK1033	33.928
SMK1034	33.928
SMK1035	33.928
SMK1036	33.928
SMK1037	33.928
SMK1038	33.928
SMK1039	33.928
SMK1040	34.197
SMK1041	34.197
SMK1042	34.197
SMK1043	34.197
SMK1044	34.197
SMK1045	34.197
SMK1046	34.197
SMK1047	34.197
SMK1048	34.197
SMK1049	34.197
SMK1050	34.197
SMK1051	34.197
SMK1052	34.197
SMK1053	34.197
SMK1054	34.197
SMK1055	34.197
SMK1056	34.197
SMK1057	34.197
SMK1058	34.197
SMK1059	34.197
SMK1060	34.197
SMK1061	34.197
SMK1062	34.197
SMK1063	34.197
SMK1064	34.197
SMK1065	34.197
SMK1066	34.197
SMK1067	34.197
SMK1068	34.197
SMK1069	34.197
SMK1070	34.197
SMK1071	34.197
SMK1072	34.197
SMK1073	34.197
SMK1074	34.197
SMK1075	34.197
SMK1076	34.197
SMK1077	34.197
SMK1078	34.197
SMK1079	34.197
SMK1080	35.008
SMK1081	35.275
SMK1082	36.086
me8em16-92	37.092
SMK1083	38.021
RN34H10	40.937
SMK1084	41.132
SMK1085	42.219
SMK1086	43.034
SMK1087	43.034
SMK1088	43.034
SMK1089	43.303
AHGS1337	43.736
SMK1090	44.677
Ah3TC24B05	45.675
GA21	46.266
SMK1091	48.442
Ah2TC07C06	48.779
AHTE0372	51.544
SMK1092	52.569
SMK1093	60.078
SMK1094	65.155
SMK1095	65.701
SMK1096	65.973
SMK1097	65.973
SMK1098	65.973
SMK1099	65.973
SMK1100	65.973
SMK1101	65.973
SMK1102	65.973
Chromosome A07
SMK1105	0
SMK1103	0
AhTE0706	0
SMK1104	0.013
SMK1106	0.605
SMK1107	1.015
SMK1108	6.117
AHGS1296	12.926
AHGS1127	18.622
SMK1109	21.009
SMK1110	22.169
SMK1111	22.308
SMK1115	22.641
SMK1112	22.641
SMK1114	22.641
SMK1116	22.641
SMK1113	22.641
TC41A1	24.782
AHGS1692	29.94
AHGS1692	33.594
SMK1124	36.048
SMK1125	36.279
SMK1120	36.751
SMK1119	37.166
SMK1126	37.467
SMK1117	37.544
SMK1123	37.59
SMK1121	37.647
SMK1122	37.696
SMK1118	38.157
SMK1127	38.906
SMK1128	38.906
SMK1129	39.633
SMK1132	40.015
SMK1131	40.311
SMK1130	40.478
SMK1133	40.672
Ah3TC38C01a	40.961
SMK1134	42.985
SMK1135	43.35
SMK1136	43.458
SMK1138	43.965
SMK1137	43.971
SMK1139	44.288
SMK1141	44.57
SMK1140	44.593
SMK1142	45.733
SMK1143	45.871
SMK1144	46.28
SMK1145	46.827
SMK1187	47.636
SMK1180	47.75
SMK1182	47.853
SMK1165	47.853
SMK1164	47.87
SMK1185	47.918
SMK1175	47.942
SMK1184	47.952
SMK1170	47.96
SMK1171	47.962
SMK1163	47.978
SMK1186	47.995
SMK1161	48.003
SMK1162	48.006
SMK1183	48.018
SMK1177	48.019
SMK1166	48.024
SMK1178	48.029
SMK1174	48.03
SMK1179	48.03
SMK1173	48.048
SMK1181	48.068
SMK1160	48.125
SMK1150	48.147
SMK1155	48.167
SMK1146	48.187
SMK1148	48.191
SMK1153	48.191
SMK1151	48.192
SMK1159	48.193
SMK1147	48.193
SMK1152	48.198
SMK1157	48.2
SMK1158	48.201
SMK1189	48.208
SMK1149	48.229
SMK1154	48.23
SMK1156	48.241
SMK1172	48.271
SMK1176	48.3
SMK1168	48.327
SMK1169	48.331
SMK1167	48.356
SMK1188	48.409
SMK1190	49.088
SMK1191	49.159
SMK1192	54.835
SMK1193	58.591
SATE0505	61.137
Ah3TC38C01b	61.961
SMK1194	67.593
SMK1195	68.412
SMK1197	69.107
SMK1196	69.151
SMK1200	69.781
SMK1198	70.105
SMK1201	70.342
SMK1203	70.448
SMK1202	70.474
SMK1199	70.766
GM1990	70.97
SMK1204	72.834
SMK1205	76.541
SMK1211	84.681
SMK1208	87.285
SMK1207	87.895
SMK1210	89.528
SMK1209	89.614
SMK1206	90.08
Chromosome A08
SMK1219	0
AHGS1138	0
SMK1218	0.136
SMK1217	0.463
SMK1215	1.031
SMK1216	1.074
AHS0116	1.221
me3em14-196	1.395
SMK1214	1.619
SMK1212	1.864
SMK1213	1.867
HBAUAh177	2.674
AHGS1578	8.458
RN23A07	8.966
AhTE0658	9.42
seq2F05	11.782
Ah1TC06H03	15.535
AHGS1884	21.146
SMK1220	23.968
Ah4-4	24.581
SMK1352	25.919
AhTE0477	26.911
SMK1222	31.602
SMK1351	32.082
Ah2TC09B08	32.375
AHGS1866	32.662
SMK1350	32.702
SMK1223	33.766
SMK1221	34.16
SMK1224	34.388
SMK1225	34.466
SMK1226	34.695
SMK1229	35.514
SMK1348	35.656
SMK1227	36.046
SMK1349	36.295
SMK1228	36.6
SMK1347	36.74
SMK1231	37.992
SMK1230	38.209
SMK1238	38.437
SMK1232	38.533
SMK1239	38.736
SMK1233	38.9
SMK1237	39.002
SMK1234	39.202
SMK1245	39.362
SMK1246	39.389
SMK1240	39.872
SMK1250	40.295
SMK1302	40.604
SMK1301	40.934
SMK1299	40.995
SMK1282	41.186
SMK1291	41.312
SMK1286	41.384
SMK1288	41.398
SMK1296	41.483
SMK1260	41.558
SMK1273	41.659
SMK1265	41.669
SMK1267	41.687
SMK1271	41.696
SMK1270	41.699
SMK1277	41.712
SMK1274	41.727
SMK1278	41.731
SMK1263	41.734
SMK1261	41.734
SMK1276	41.737
SMK1275	41.739
SMK1269	41.758
SMK1262	41.767
SMK1272	41.768
SMK1268	41.776
SMK1266	41.792
SMK1264	41.811
SMK1256	41.883
SMK1259	41.915
SMK1279	41.962
SMK1251	41.981
SMK1255	42.03
SMK1258	42.053
SMK1280	42.064
SMK1281	42.065
SMK1257	42.12
SMK1285	42.149
SMK1292	42.152
SMK1290	42.204
SMK1283	42.225
SMK1284	42.226
SMK1294	42.229
SMK1297	42.262
SMK1293	42.275
SMK1289	42.313
SMK1295	42.345
SMK1287	42.367
SMK1298	42.456
SMK1254	42.521
SMK1253	42.553
SMK1252	42.672
SMK1243	42.969
AHGS1947b	42.985
SMK1249	43.082
SMK1247	43.087
SMK1236	43.19
SMK1244	43.256
SMK1241	43.307
SMK1235	43.424
SMK1248	43.488
SMK1242	43.558
SMK1300	44.231
SMK1303	45.357
SMK1305	46.013
SMK1304	46.205
AHGS1947a	46.672
SMK1311	47.566
SMK1313	47.823
SMK1314	47.875
SMK1307	47.904
SMK1306	47.921
SMK1309	48.078
SMK1310	48.337
SMK1312	48.377
SMK1308	48.611
SMK1322	48.771
SMK1323	48.781
SMK1316	49.645
SMK1318	50.06
SMK1320	50.3
SMK1319	50.401
SMK1317	50.474
AHGS1879	50.674
SMK1321	50.75
SMK1315	51.172
SMK1328	51.558
SMK1346	52.324
SMK1327	52.92
SMK1324	52.997
SMK1326	53.222
SMK1325	53.421
SMK1330	53.787
SMK1329	53.807
SMK1343	55.335
SMK1344	55.357
SMK1331	55.828
SMK1338	56.364
SMK1333	56.785
SMK1334	56.886
SMK1332	56.908
SMK1337	57.207
SMK1336	57.292
SMK1339	57.611
SMK1335	57.736
SMK1341	58.588
SMK1345	59.008
SMK1342	59.301
SMK1340	59.607
AHS1760	72.351
Chromosome A09
SMK1395	0
RM13A12-A09	0
me10em6-244	1.243
SMK1394	1.755
T3me4-50	1.881
me10em13-84	2.432
me12em17-140	4.49
seq17E3	5.856
T1me9-146	5.99
me11em6-50	6.45
SMK1356	6.921
SMK1358	6.962
SMK1354	6.97
SMK1353	6.97
SMK1357	6.973
SMK1355	7.034
ARS730	7.048
SMK1360	7.083
SMK1359	7.083
SMK1361	7.146
SMK1363	8.467
SMK1366	8.668
SMK1365	9.198
SMK1364	9.242
T1em12-80	9.32
SMK1386	10.268
SMK1387	10.397
GM1047	10.53
SMK1388	10.555
SMK1367	10.83
T5em4-80	10.999
SMK1380	11.008
SMK1381	11.018
SMK1385	11.018
SMK1379	11.056
SMK1368	11.129
SMK1383	11.198
SMK1382	11.201
SMK1378	11.264
SMK1377	11.376
SMK1370	11.379
SMK1372	11.381
SMK1373	11.381
SMK1369	11.404
SMK1371	11.408
SMK1374	11.433
SMK1376	11.457
SMK1375	11.461
SMK1384	11.601
TC1B02	11.696
SMK1362	11.854
T1em12-105	11.95
me5em6-88	13.288
SMK1389	13.793
SMK1390	14.39
SMK1391	14.54
SMK1392	14.674
SMK1393	14.823
me8em2-50	14.982
AHGS2440	15.555
AhTE0511	16.782
ARS766	17.324
AHBGSI1006F08	17.425
GM1979	18.024
GM1291	18.222
AHGS1478b	18.574
AHGS2722	18.881
GM1911	19.195
AHGS2559	19.399
AHGS0362	19.851
AHS1950	20.044
GM66	20.776
GM1076	21.241
T1me13-75	21.827
SMK1396	22.467
RN27A10	23.052
AHTE0122	24.982
HBAUAh098	26.548
HBAUAh096	27.188
PM119	30.225
PM50	30.602
T1me3-300	33.607
me9em9-250	37.336
me9em9-103	41.751
SMK1397	43.517
AHS1620	44.512
SMK1398	44.714
SMK1399	45.32
SMK1400	47.124
me4em15-230	52.51
RN25D11	52.674
Chromosome A10
SMK1401	0
AhTE0097-A10	0
SMK1404	0.553
SMK1407	0.562
SMK1406	0.57
SMK1405	0.579
SMK1411	0.587
SMK1408	0.587
SMK1410	0.635
SMK1409	0.714
SMK1412	0.759
SMK1413	0.781
SMK1414	1.025
SMK1421	2.355
SMK1422	2.733
SMK1417	3.761
SMK1416	3.773
SMK1415	3.883
SMK1420	4.201
SMK1424	4.434
SMK1418	4.541
SMK1423	4.794
SMK1419	4.891
AHGS1306d-A10	6.175
AhTE0586-A10	6.65
SMK1426	7.272
SMK1425	7.798
SMK1427	8.217
SMK1430	8.822
SMK1429	8.848
SMK1428	9.102
SMK1432	9.664
SMK1431	9.691
SMK1439	9.889
SMK1435	10.239
SMK1434	10.253
SMK1433	10.253
SMK1437	10.382
SMK1436	10.542
SMK1438	10.839
AHGS1306a-A10	12.398
SMK1440	13.45
AHGS1192-A10	21.477
seq3e10-A10	40.407
Chromosome B01
SMK1627	0
SATE0548	0
SMK1625	0.094
SMK1628	0.376
SMK1624	0.576
SMK1629	0.669
SMK1623	0.852
SMK1630	0.997
SMK1631	1.013
SMK1637	1.064
SMK1636	1.17
SMK1632	1.173
SMK1635	1.203
SMK1633	1.264
SMK1634	1.371
SMK1622	1.431
SMK1599	1.754
SMK1620	1.805
SMK1621	1.814
SMK1600	1.952
SMK1598	1.957
SMK1608	2.012
SMK1587	2.041
SMK1586	2.044
SMK1609	2.058
SMK1601	2.084
SMK1589	2.117
SMK1590	2.125
SMK1588	2.127
SMK1618	2.141
SMK1603	2.172
SMK1584	2.2
SMK1596	2.243
SMK1597	2.243
SMK1594	2.247
SMK1595	2.249
SMK1605	2.267
SMK1606	2.267
SMK1604	2.285
SMK1602	2.291
SMK1585	2.327
SMK1607	2.346
SMK1617	2.357
SMK1593	2.372
SMK1583	2.409
SMK1610	2.41
SMK1619	2.411
SMK1614	2.419
SMK1612	2.42
SMK1611	2.441
SMK1613	2.484
SMK1615	2.506
SMK1616	2.517
SMK1577	2.527
SMK1592	2.578
SMK1591	2.637
SMK1580	2.657
SMK1579	2.687
SMK1582	2.721
SMK1578	2.76
SMK1576	2.773
SMK1575	2.793
SMK1573	2.938
SMK1574	2.994
SMK1581	3.045
SMK1529	3.19
SMK1570	3.267
SMK1533	3.346
SMK1531	3.352
SMK1532	3.411
SMK1530	3.414
SMK1534	3.416
SMK1528	3.464
SMK1527	3.473
SMK1523	3.551
SMK1571	3.571
SMK1568	3.594
SMK1569	3.609
SMK1524	3.663
SMK1511	3.669
SMK1525	3.696
SMK1536	3.734
SMK1543	3.734
SMK1546	3.737
SMK1548	3.738
SMK1540	3.739
SMK1537	3.741
SMK1542	3.745
SMK1547	3.745
SMK1538	3.745
SMK1558	3.75
SMK1544	3.752
SMK1522	3.759
SMK1539	3.76
SMK1535	3.761
SMK1541	3.787
SMK1520	3.813
SMK1515	3.821
SMK1513	3.824
SMK1512	3.827
SMK1521	3.828
SMK1526	3.856
SMK1549	3.87
SMK1514	3.87
SMK1564	3.872
SMK1517	3.88
SMK1518	3.884
SMK1516	3.885
SMK1545	3.89
SMK1492	3.897
SMK1519	3.906
SMK1497	3.907
SMK1506	3.91
SMK1550	3.96
SMK1505	3.972
SMK1554	4.019
SMK1560	4.022
SMK1555	4.023
SMK1567	4.025
SMK1561	4.026
SMK1565	4.03
SMK1551	4.033
SMK1552	4.033
SMK1553	4.033
SMK1563	4.038
SMK1556	4.05
SMK1557	4.058
SMK1562	4.062
SMK1501	4.084
SMK1495	4.122
SMK1559	4.131
SMK1509	4.139
SMK1503	4.14
SMK1500	4.142
SMK1496	4.143
SMK1507	4.143
SMK1498	4.143
SMK1508	4.143
SMK1499	4.144
SMK1510	4.146
SMK1566	4.149
SMK1504	4.149
SMK1493	4.172
SMK1494	4.176
SMK1502	4.184
SMK1572	4.329
SMK1491	4.442
SMK1489	4.506
SMK1467	4.595
SMK1455	4.596
SMK1468	4.599
SMK1488	4.601
SMK1490	4.605
SMK1487	4.615
SMK1478	4.615
SMK1458	4.652
SMK1469	4.678
SMK1479	4.682
SMK1480	4.704
SMK1472	4.733
SMK1453	4.761
SMK1459	4.791
SMK1483	4.85
SMK1482	4.862
SMK1485	4.862
SMK1486	4.863
SMK1481	4.865
SMK1471	4.873
SMK1484	4.888
SMK1470	4.945
SMK1462	4.961
SMK1474	4.985
SMK1473	4.996
SMK1476	5.01
SMK1475	5.029
SMK1460	5.073
SMK1461	5.077
SMK1477	5.105
SMK1452	5.19
SMK1464	5.192
SMK1457	5.192
SMK1465	5.193
SMK1463	5.262
SMK1466	5.275
SMK1456	5.336
SMK1454	5.412
SMK1451	5.717
SMK1449	6.301
SMK1450	6.743
SMK1447	7.353
SMK1448	7.361
SMK1446	9.925
SMK1445	12.097
SMK1441	13.075
AhTE0536	13.343
SMK1444	14.347
SMK1443	14.759
SMK1442	16.278
AHGS1487	20.82
GM2062	31.941
GM1771	40.16
Ah3TC16A10	48.824
TC7D03	56.578
Chromosome B02
SMK1708	0
TC9F04	0
SMK1707	0.197
SMK1706	0.482
SMK1705	0.881
seq2G04	1.453
SMK1704	4.322
SMK1702	4.545
SMK1701	4.819
SMK1703	5.26
AHGS1940	6.453
AhTE0577	6.536
SMK1700	6.903
SMK1698	7.343
SMK1699	8.302
AHGS1354	8.629
AHTE0398	10
AhTE0628	14.008
AHGS1419	21.653
SMK1649	22.876
SMK1651	23.242
SMK1650	23.516
SMK1655	24.589
SMK1652	24.932
SMK1653	25.017
SMK1654	25.319
SMK1657	25.633
SMK1656	25.813
SMK1659	26.514
SMK1658	26.534
Ad90P7	26.659
SMK1665	26.687
SMK1666	26.693
SMK1660	26.986
SMK1664	27.22
SMK1662	27.604
SMK1663	27.649
SMK1661	27.709
SMK1667	28.315
SMK1671	28.32
SMK1670	28.322
SMK1669	28.368
SMK1675	29.002
SMK1668	29.253
CTW_NEW_38	29.536
SMK1674	29.643
SMK1673	29.899
SMK1672	29.98
AHGS1289	30.767
SMK1676	30.825
SMK1677	31.107
SMK1696	32.958
SMK1695	33.487
SMK1697	33.653
SMK1681	34.815
SMK1680	34.962
SMK1678	35.008
SMK1683	35.022
SMK1682	35.134
SMK1679	35.134
SMK1684	35.159
AHS1855	35.27
SMK1685	35.389
SMK1686	35.434
SMK1692	35.531
SMK1694	35.566
SMK1693	35.566
SMK1687	35.712
SMK1688	35.738
SMK1689	36.045
SMK1690	36.143
SMK1691	36.143
SMK1648	37.966
TC42A05	39.599
SMK1647	39.994
SMK1646	42.874
SMK1645	45.76
SMK1639	51.968
SMK1638	52.758
SMK1644	54.619
SMK1642	55.197
SMK1640	55.619
SMK1643	56.016
SMK1641	56.408
Chromosome B03
SMK1709	0
PM238	0
AhTE0565	0
SMK1710	2.135
AHBGSC1003E10	2.834
SMK1711	3.247
SMK1712	3.518
SMK1713	4.343
SMK1714	7.49
GM1996b	8.825
SMK1715	8.864
SMK1716	9.679
SMK1717	10.494
SMK1718	11.31
GM1996a	11.637
SMK1719	12.684
SMK1720	12.951
SMK1721	13.218
SMK1722	14.029
SMK1723	14.403
SMK1724	14.78
SMK1725	16.553
GM1502	17.615
SMK1726	17.635
SMK1727	18.115
SMK1728	18.328
seq2B10	18.672
SMK1729	18.809
SMK1730	19.291
SMK1731	19.504
SMK1732	19.876
SMK1733	20.248
SMK1734	20.73
seq2C11a	20.833
SMK1735	20.996
SMK1736	21.102
SMK1737	21.475
SMK1738	21.847
SMK1739	22.326
SMK1740	22.538
SMK1741	22.751
PM3	22.865
SMK1742	23.23
SMK1743	23.443
SMK1744	23.443
SMK1745	23.656
SMK1746	24.028
SMK1747	24.241
SMK1748	24.453
SMK1749	24.666
SMK1750	24.985
PM31	25.034
SMK1751	25.742
SMK1752	25.954
SMK1753	26.327
SMK1754	26.699
SMK1755	27.071
SMK1756	27.721
GM1954	27.96
SMK1757	28.094
PM434	28.568
SMK1758	28.572
SMK1759	29.051
SMK1760	29.53
SMK1761	30.009
SMK1762	30.221
SMK1763	30.434
SMK1764	30.807
SMK1765	31.019
SMK1766	31.232
SMK1767	31.445
SMK1768	31.817
SMK1769	32.296
SMK1770	32.775
SMK1771	32.987
SMK1772	32.987
SMK1773	32.987
SMK1774	33.2
SMK1775	33.413
SMK1776	34.06
SMK1777	34.592
SMK1778	34.805
GM2308	35.279
SMK1779	35.57
SMK1780	35.783
SMK1781	35.783
SMK1782	36.319
SMK1783	36.319
SMK1784	36.696
SMK1785	36.696
SMK1786	37.068
SMK1787	37.387
SMK1788	37.706
SMK1789	38.185
SMK1790	38.664
SMK1791	39.143
Ah3TC29H08-B03	39.34
SMK1792	39.462
SMK1793	39.781
SMK1794	40.1
seq14C11	40.404
SMK1795	40.419
SMK1796	40.632
SMK1797	41.388
SMK1798	42.301
[truncated: 1,151 more rows]
