# Supplementary material for: Mapping Quantitative Trait Locus (QTLs) for Hundred Pod and Seed Weight under Seven Environments in a RIL Cultivated Peanut (<em>Arachis hypogaea</em> L.) Population
Source: Preprints.org preprint supplement (doi:10.20944/preprints202308.1384.v1), 2023-08-18
Supplement: Supplementary file 3 [file Table S2.xlsx]

## Sheet: Sheet1
Table 2 Gene Ontology (GO) enrichment analyses of different express genes
Gene Names	Gene ID	GO categories	GO term ID	Description	GeneRatio	BgRatio	enrich_factor	pvalue	qvalue
Arahy.CX54HG	arahy.Tifrunner.gnm2.ann1.CX54HG	Biological processes	GO:0006413	translational initiation	1/6	37/15546	70.03	0.0141978	0.014945
Arahy.7ZYB2E	arahy.Tifrunner.gnm2.ann1.7ZYB2E	Biological processes	GO:0045454	cell redox homeostasis	1/6	215/15546	12.05	0.0801754	0.0421976
Arahy.IUT8LB	arahy.Tifrunner.gnm2.ann1.IUT8LB	Cellular components	GO:0019898	extrinsic component of membrane	1/2	55/7716	70.15	0.0142062	NA
Arahy.XZZ787	arahy.Tifrunner.gnm2.ann1.XZZ787	Molecular functions	GO:0016757	transferase activity, transferring glycosyl groups	1/3	146/15801	36.08	0.0274661	NA
