# Supplementary material for: Mapping Quantitative Trait Locus (QTLs) for Hundred Pod and Seed Weight under Seven Environments in a RIL Cultivated Peanut (<em>Arachis hypogaea</em> L.) Population
Source: Preprints.org preprint supplement (doi:10.20944/preprints202308.1384.v1), 2023-08-18
Supplement: Supplementary file 4 [file Table S3.xlsx]

## Sheet: Sheet1
Table 3 KEGG enrichment analyses of different express genes
Gene Names	Gene ID	KEGG ID	Description	GeneRatio	BgRatio	enrich_factor	pvalue	qvalue
Arahy.CPLC2W	arahy.Tifrunner.gnm2.ann1.CPLC2W	ko00062	Fatty acid elongation	1/6	122/22493	30.73	0.0321089	0.0348915
Arahy.D52S1Z	arahy.Tifrunner.gnm2.ann1.D52S1Z	ko00904	Diterpenoid biosynthesis	1/6	126/22493	29.75	0.0331469	0.0348915
Arahy.IUT8LB	arahy.Tifrunner.gnm2.ann1.IUT8LB	ko00195	Photosynthesis	1/6	254/22493	14.76	0.0658773	0.0375835
Arahy.CPLC2W	arahy.Tifrunner.gnm2.ann1.CPLC2W	ko01212	Fatty acid metabolism	1/6	276/22493	13.58	0.0714087	0.0375835
